# Supplementary material for: Association of the receptor for activated C-kinase 1 with ribosomes in Plasmodium falciparum
Source: PubMed Central journal article supplement — J Biol Chem. 2022 Apr 20;298(6):101954. doi: 10.1016/j.jbc.2022.101954 (PMC9120242; doi:10.1016/j.jbc.2022.101954), 2022-04-20
Supplement: mmc2.pdf [file mmc2.pdf]

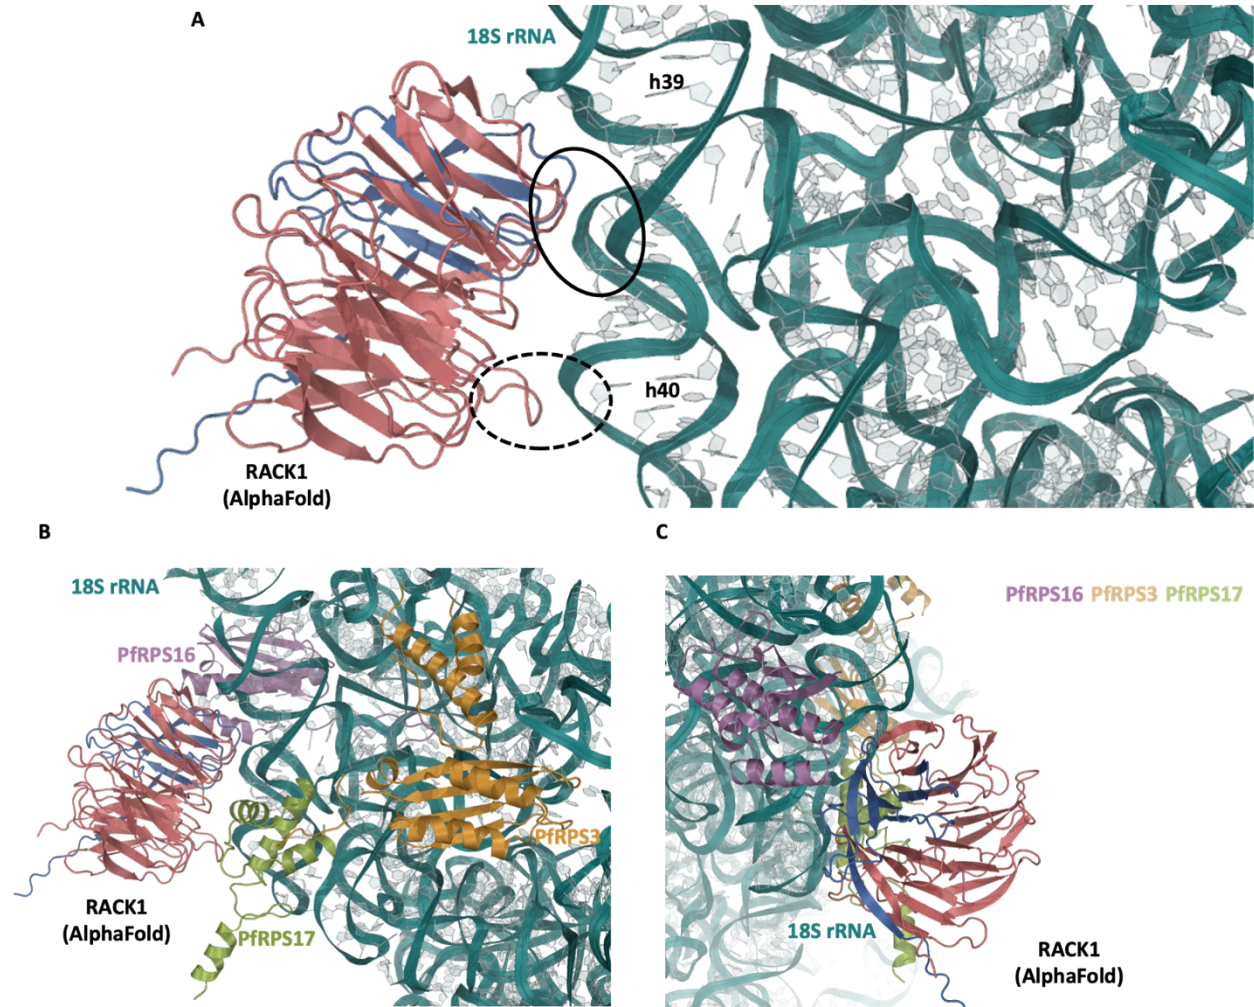

**SUPPLEMENTAL FIGURE 1. STRUCTURAL ANALYSIS OF THE PFRACK1 ALPHAFOLD PROTEIN MODEL BINDING TO *P. FALCIPARUM* 40S RIBOSOME SUBUNIT.** All structures displayed are *P. falciparum* proteins/RNA. **(A)** The structure of the *P. falciparum* 80S ribosome (RCSB PDB ID: 3jbo) was structurally aligned with the human 80S ribosome (RCSB PDB ID: 3jag). The model of PfRACK1 was obtained from the AlphaFold protein database and structurally aligned with that of the human 80S bound RACK1. The view shown is that which has been previously published arguing for the importance of the regions noted in RACK1 binding to the ribosome. Solid circle: region vital for HsRACK1:Hs80S binding. Dotted circle: Loop region that varies highly species to species, and while not required, may influence binding. **(B)** The same view as above, however ribosomal binding proteins with potential interactions are shown. **(C)** A 180-degree flipped view to show additional RPS16 (uS9) and RACK1 interactions. Note: Region in blue is that when exchanged between human and *P. falciparum* enabled binding of parasite RACK1 to the human 40S ribosome.

## RPS3 (uS3) Alignment

|        |                                                              |     |
|--------|--------------------------------------------------------------|-----|
| HsRPS3 | MAVQISKRRKRVADGIFKAELNEFLTRELAEDGYSGVEVRVTPTRTEIILATRTQNVLG  | 60  |
| PfRPS3 | MSAPISKRRKFINDGVFQAELNEFLARILAEDGYSGVEVRVTPIRTEVIIRATRTRVVLG | 60  |
|        | *: . *****: *: *: *****: * ***** ***** *: *: * *: * *: *     |     |
| HsRPS3 | EKGRRIRELTAVVQKRF-GFPEGSVELYAEKVATRGLCAIAQAESLRYKLLGGLAVRRAC | 119 |
| PfRPS3 | DKGRRIRELTSLVQKRFFNKSTNSVELFAERVEHRGLCAMAQAESLRYKLLKGLAVRRAC | 120 |
|        | : *****: *: * . . *****: *: * ***** ***** *****              |     |
| HsRPS3 | YGLRFIMESGAKGCEVVVSGKLRGQRAKSMKFVDGLMIHSGDPVNYVDTAVRHVLLRQ   | 179 |
| PfRPS3 | YGLRHIMESGAKGCEVIVSGKLRQRAKSMKFRDGYLISTGEPKRFVNTATRSAQLKQ    | 180 |
|        | ***** *****: ***** ***** * *: *: * *: *: * *: * . *: *       |     |
| HsRPS3 | GVLGIKVKIMLPWPTGKIGPKKPLPDHVSIVEPKDEILPTTPISEQGGKPEPPAMPQP   | 239 |
| PfRPS3 | GVLGIKVKIMLPTAIDTRTGLTSLPDNISVLEPKTDVLDL-----                | 221 |
|        | *****: * . . *****: *: * *: * *: * *: * *: *                 |     |
| HsRPS3 | VP                                                           | 243 |
| PfRPS3 | ---                                                          | 221 |

## RPS16 (uS9) Alignment

|         |                                                                               |     |
|---------|-------------------------------------------------------------------------------|-----|
| HsRPS16 | MPSKGPLQSVQVFRKKTATAVAHCKRGNLIKVNGRPLEMIEPRTLQYKLEPVLLLGK                     | 60  |
| PfRPS16 | --MTTKVKRVQTFGKKKTAVAVATVTNGKGLIKLNGKNLDELVEPYILKTKVYEPLWLIGS                 | 58  |
|         | . : : * . * *: * *: * * . . * : * *: * *: * *: * *: * *: *                    |     |
| HsRPS16 | ERFAGVDIRVRVKGGGHVAQIYAIRQISKALVAYYQKYVDEASKKEIKDILIQYDRILL                   | 120 |
| PfRPS16 | GKLNLDIRIRVKGQQTSQIYAIRQAIGKIISYYQKYVDESTKKELKDVLLRYDRSLL                     | 118 |
|         | : : . : * *: * *: * *: : * *: * *: * . * . : : * * * * * : * *: * *: * *: * * |     |
| HsRPS16 | VADPRRCESKKFGGPGARARYQKSYR                                                    | 146 |
| PfRPS16 | VDTRRCEPKKFGGKARARYQKSYR                                                      | 144 |
|         | * . * * * * * * * * * * * * * * * * * * * * * * * * * * * * * * * * * * *     |     |

## RPS17 (eS17) Alignment

|         |                                                                         |     |
|---------|-------------------------------------------------------------------------|-----|
| HsRPS17 | MGRVTRKTVKKAARVIEKYTRLGNDFHTMKRVCEEIALLIPSKKLRNKIAGYVTHLMKR             | 60  |
| PfRPS17 | MGRVTRKTIKRAARQIVEKYAKLTLDFQINKKITEEVALIPSKRMKNKVAGFVTHLMKR             | 60  |
|         | *****: *: * * *: * *: * *: * *: * *: * *: * *: * *: * *: * *: *         |     |
| HsRPS17 | IQRGPVRGISIKLQEEERERRDNYVPEVSALDQEIIEVDPDTKEMLKLLDFGSLSNLQVT            | 120 |
| PfRPS17 | IQKGPVRGISIKLQEEERERRLDFVPEKSQIDVSVIYVEPDLRMIKSLGIN-INSMKVH             | 119 |
|         | * *: * *: * *: * *: * *: * *: * *: * *: * *: * *: * *: * *: * *: * *: * |     |
| HsRPS17 | QPTVGMNFKTPRGPV---                                                      | 135 |
| PfRPS17 | NPMINTNQKQNRMNQF                                                        | 137 |
|         | : * . . * . . . .                                                       |     |

**SUPPLEMENTAL FIGURE 2. MULTIPLE SEQUENCE ALIGNMENT OF *H. SAPIENS* AND *P. FALCIPARUM* RPS3 (uS3), RPS16 (uS9), RPS17 (eS17) PROTEINS.** The *H. sapiens* and *P. falciparum* sequences were collected from the UniProt database<sup>52</sup> and PlasmoDB<sup>31</sup>, respectively, and aligned using the Clustal  $\Omega$  MSA tool<sup>53</sup>. Residues in the 3-5 Å range were determined using PyMol.

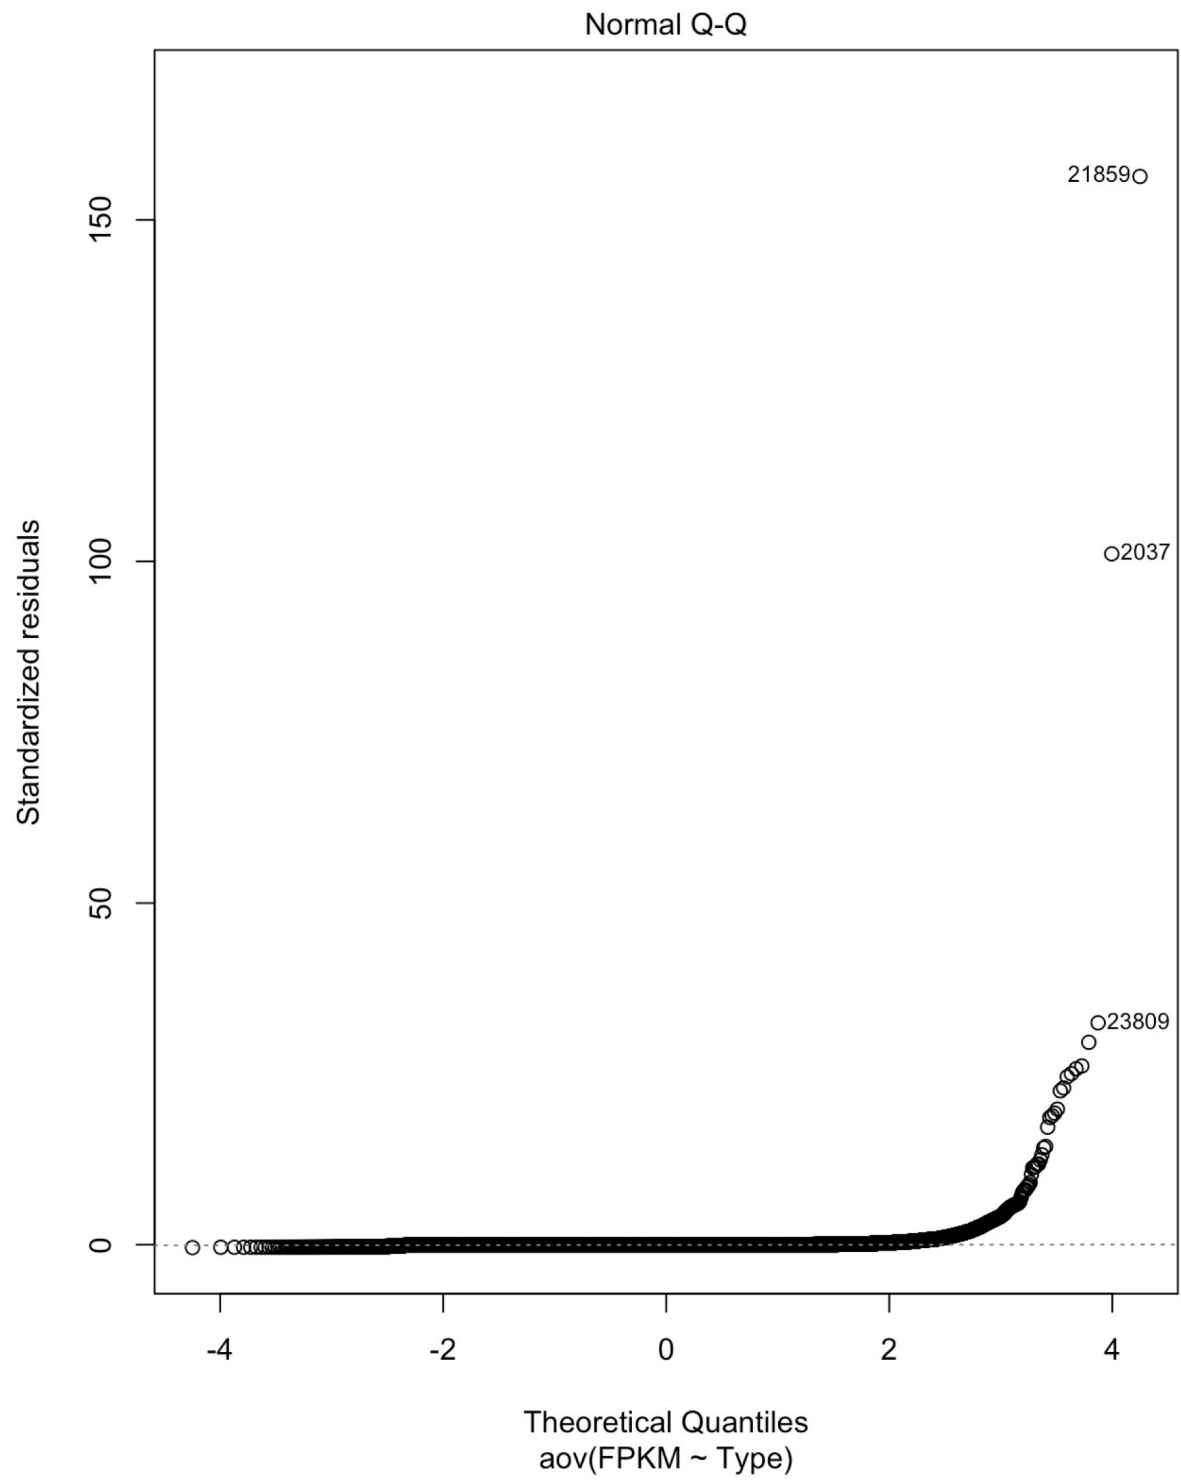

**SUPPLEMENTAL FIGURE 3. PLOT OF RNASEQ DATA NORMALITY.**

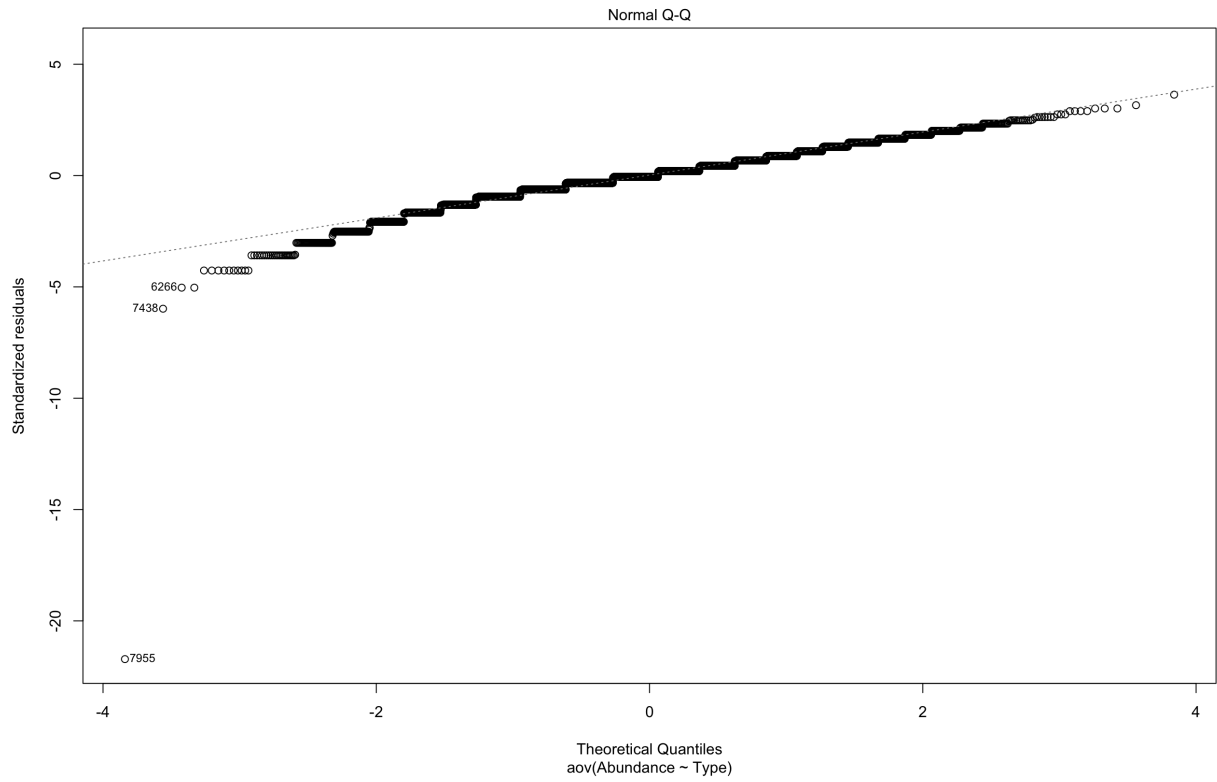

**SUPPLEMENTAL FIGURE 4. PLOT OF PROTEIN MASS SPECTROMETRY DATA NORMALITY.**

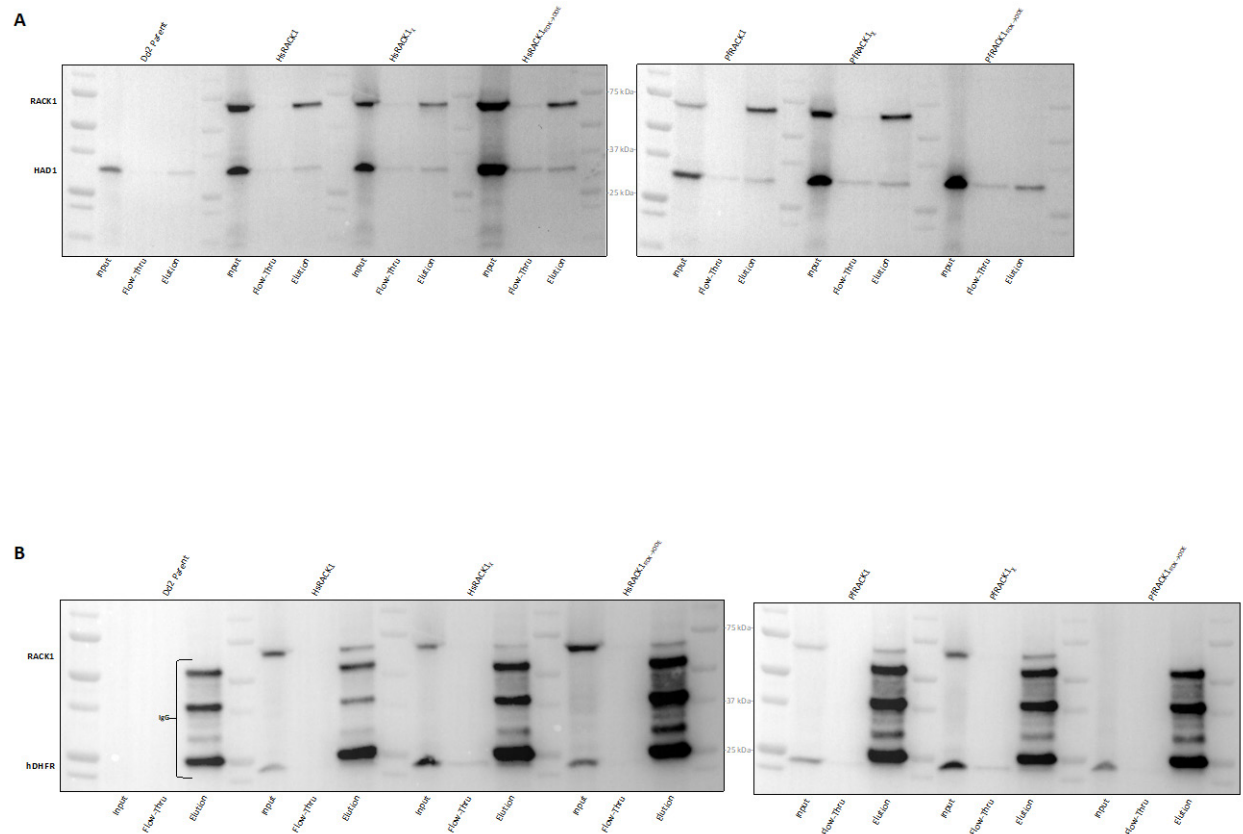

**SUPPLEMENTAL FIGURE 5. HA-IMMUNOPRECIPITATION OF RACK1 VARIANTS EXPRESSED IN *P. FALCIPARUM* DD2. (A) Samples were blotted with mouse anti-HA-HRP antibody and rabbit anti-PfHAD1/anti-rabbit-HRP. (B) Samples were blotted with mouse anti-HA and mouse anti-hDHFR antibodies and subsequently blotted with anti-mouse-HRP antibody demonstrating presence of plasmid resistance containing PfRACK1<sub>RDK→DDE</sub> mutant.**

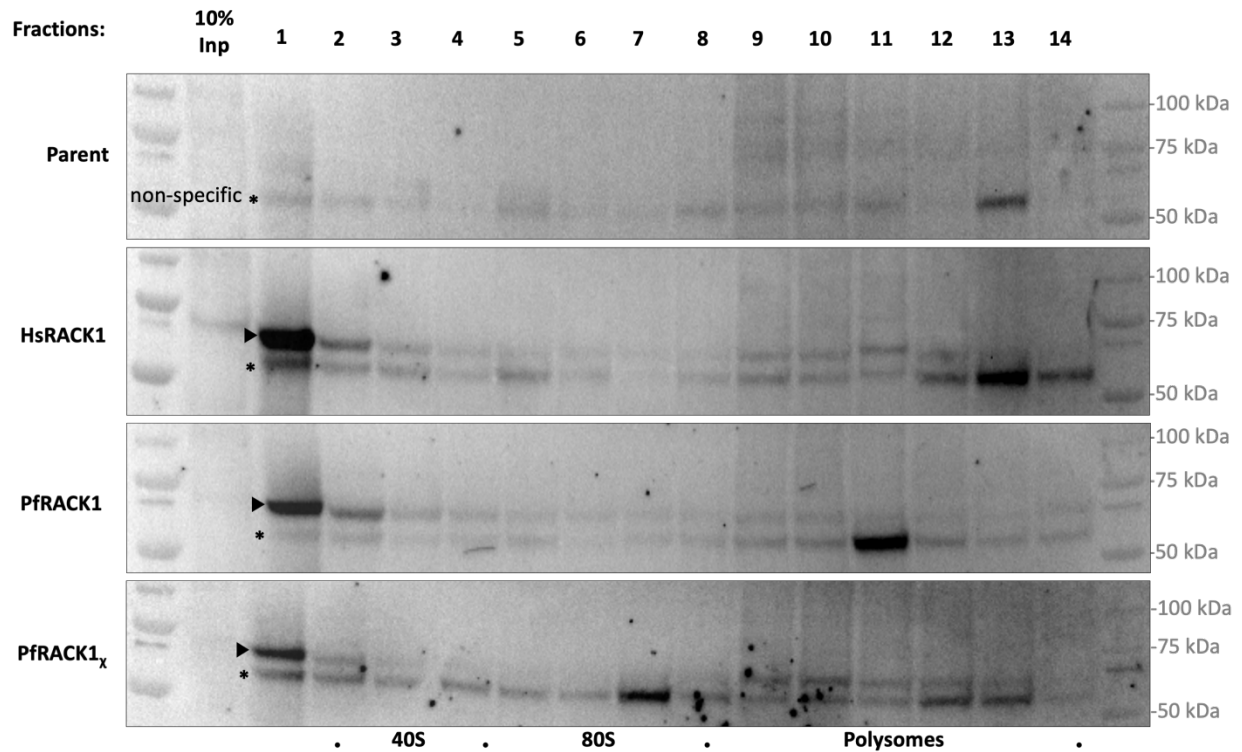

**SUPPLEMENTAL FIGURE 6. POLYSOME PROFILING OF HsRACK1, PfRACK1, AND PfRACK1<sub>x</sub> VARIANTS IN *P. FALCIPARUM* DD2 PARASITES.** Polysome profiling fractions generated from *P. falciparum* parasites expressing HsRACK1, PfRACK1, and PfRACK1<sub>x</sub> variants were analyzed. Western blot shows RACK1 variant polysome fraction localization. RT-qPCR analysis shows localization of 18S and 28S rRNAs associated with the 40S and 80S subunits, respectively. Asterisk indicates non-specific band found in parent line not correlating to RACK1 variants. Arrowhead indicates RACK1 variant band.



A

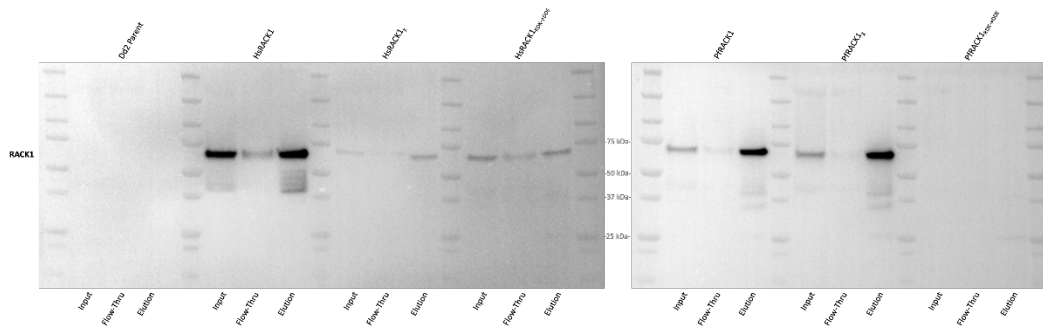

B

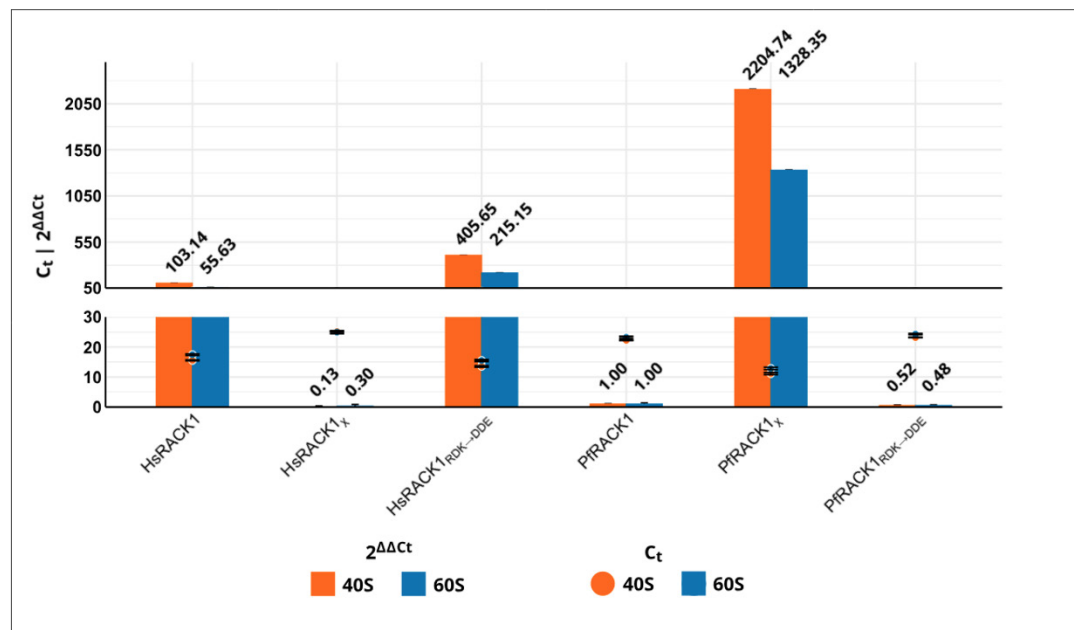

**SUPPLEMENTAL FIGURE 7. HA-IMMUNOPRECIPITATION OF RACK1 VARIANTS BOUND TO rRNA EXPRESSED IN *P. FALCIPARUM* Dd2.** (A) Samples were blotted with mouse anti-HA-HRP antibody to show enrichment of HA-tagged RACK1 variants. (B) RT-qPCR was performed on RNA isolated from HA-immunoprecipitations of parasites expressing the RACK1 variants to examine rRNA binding. Samples were normalized to Dd2 parent line and then to the PIRACK1 wild type variant. The Ct (scatter plot) is displayed for each variant and the  $2^{-\Delta\Delta Ct}$  (bar graph) was calculated and plotted for each RACK1 variant.

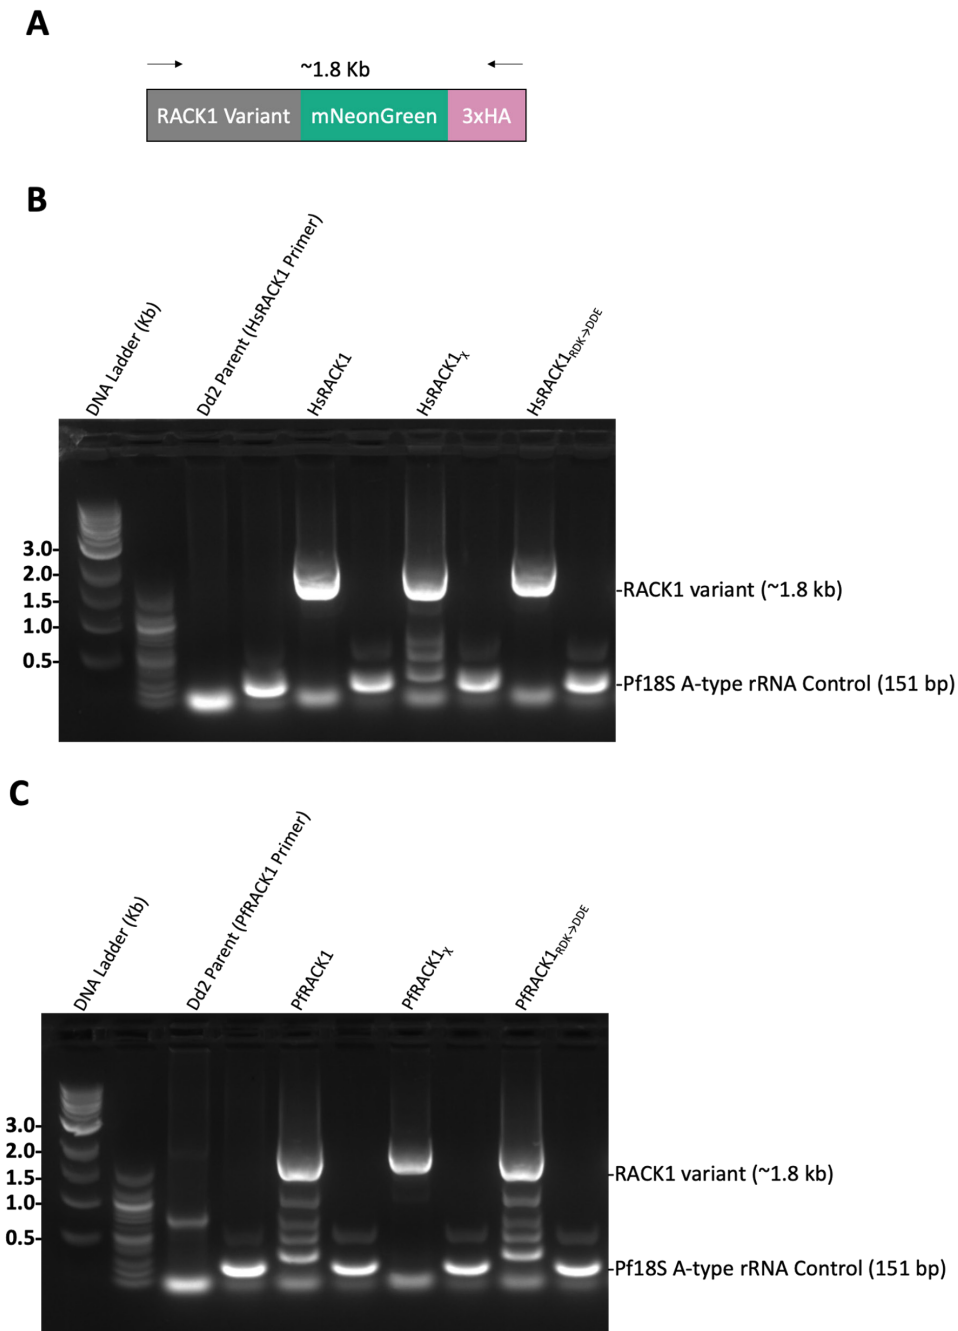

**Supplemental Figure 8. Genotyping PCR of RACK1 variants expressed in *P. falciparum* Dd2.** Total DNA was isolated from *P. falciparum* Dd2 parent line and lines expressing RACK1 variants. Genotyping PCRs generating a product schematized in (A) were performed on *P. falciparum* Dd2 parent and (B) HsRACK1 lines and (C) PFRACK1 lines. Note: PFRACK1 variants are cDNAs recoded for expression in mammalian cells whose sequences differ from the endogenous wild-type. Lanes following RACK1 variant PCR product (~1.8 Kb) is a PCR using 18S rRNA qPCR primers as a control (151 bp).



List of RACK1 sequences used in this manuscript. All sequences are cDNA version without introns.

>recoded *P. falciparum* RACK1

```
ATGATGGACAACATCAAAGAGGCCGAGATCAGCCTGCGGGGAGTTCTGGAAGGCGGACACTCTGATTG
GGTACCAGCGTGTCCACACCTACAGACCCCAAGCTGAAAACCATCGTGTCCGCCAGCCGGACAAGAA
ACTGATCGTGTGGAACATCAACACCGACGACGACAGCGGCGAGATCGGCACAGCCAAGAAGTCTCTGA
CAGGCCACAGCCAGGCCATCAACGACGTGTCCATCTCTAGCGACGGCCTGTTTGCCCTGAGCGGCTCTT
GGGATCACAGCGTCAGACTGTGGGATCTGAGCCTGGGCGAGACAATCAGAAGCTTCATCGGCCACACC
AGCGACGTGTTCTCCGTGTCTTTCAGCCCCGACAACCGGCAGATCGTGTCTGCCTCCAGAGACAAGACC
ATCAAGCTGTGGAACACACTGGCCCAGTGCAAGTACACCATCACCGACCAGCAGCACACCGACTGGATC
ACCTGTGTGCGGTTCCAGCCCATCTCCTAACCAGGCCATTATCGTGTCTGCGGCTGGGACAAGCTGGTCA
AAGTGTGGAACCTGAAGAAGTGCAGCCTGAACAAGAACCTGGAAGGCCACACCGGCGTGCTGAACACC
GTGACAATTAGCCCTGATGGCAGCCTGTGTGCCAGCGGCGGAAAAGATGGCGTGCCAAAGCTGTGGGA
CGTGAAAGAGGGCAAGCACCTGTACAGCCTGGAAACCGGCAGCACCATCAACAGCCTGTGCTTCAGCCC
CTGCGACTACTGGCTGTGTGCCGCCACCGACCGGTTTCATCAGAATCTGGAACCTCGAGAGCAAGCTGAT
CATCAGCGAGATCTACCCCGTGAAGCAGAGCAAGATCGGCGTGCCATGGTGTACCAGCCTGACTTGGA
GCGCCAATGGCCAGCTGCTGTACTGTGGCAGCACCGACGGCAACATCTACGTGTACGAAGTGAAGAAG
CACAGCGTC
```

>recoded *P. falciparum* RACK1 RDK->DDE mutation

```
ATGATGGACAACATCAAAGAGGCCGAGATCAGCCTGCGGGGAGTTCTGGAAGGCGGACACTCTGATTG
GGTACCAGCGTGTCCACACCTACAGACCCCAAGCTGAAAACCATCGTGTCCGCCAGCGACGACGAGAA
ACTGATCGTGTGGAACATCAACACCGACGACGACAGCGGCGAGATCGGCACAGCCAAGAAGTCTCTGA
CAGGCCACAGCCAGGCCATCAACGACGTGTCCATCTCTAGCGACGGCCTGTTTGCCCTGAGCGGCTCTT
GGGATCACAGCGTCAGACTGTGGGATCTGAGCCTGGGCGAGACAATCAGAAGCTTCATCGGCCACACC
AGCGACGTGTTCTCCGTGTCTTTCAGCCCCGACAACCGGCAGATCGTGTCTGCCTCCAGAGACAAGACC
ATCAAGCTGTGGAACACACTGGCCCAGTGCAAGTACACCATCACCGACCAGCAGCACACCGACTGGATC
ACCTGTGTGCGGTTCCAGCCCATCTCCTAACCAGGCCATTATCGTGTCTGCGGCTGGGACAAGCTGGTCA
AAGTGTGGAACCTGAAGAAGTGCAGCCTGAACAAGAACCTGGAAGGCCACACCGGCGTGCTGAACACC
GTGACAATTAGCCCTGATGGCAGCCTGTGTGCCAGCGGCGGAAAAGATGGCGTGCCAAAGCTGTGGGA
CGTGAAAGAGGGCAAGCACCTGTACAGCCTGGAAACCGGCAGCACCATCAACAGCCTGTGCTTCAGCCC
CTGCGACTACTGGCTGTGTGCCGCCACCGACCGGTTTCATCAGAATCTGGAACCTCGAGAGCAAGCTGAT
CATCAGCGAGATCTACCCCGTGAAGCAGAGCAAGATCGGCGTGCCATGGTGTACCAGCCTGACTTGGA
GCGCCAATGGCCAGCTGCTGTACTGTGGCAGCACCGACGGCAACATCTACGTGTACGAAGTGAAGAAG
CACAGCGTC
```

>recoded *P. falciparum* chimera (Human N-terminus, *P. falciparum* C-terminus)

```
ATGACTGAGCAGATGACCCTTCGTGGCACCCCTCAAGGGCCACAACGGCTGGGTAACCCAGATCGCTACT
ACCCCGCAGTTCCCGGACATGATCCTCTCCGCTCTCGAGATAAGACCATCATCATGTGGAAACTGACCA
GGGATGAGACCAACTATGGAATTCCACAGCGTGCTCTGCGGGGTCACTCCCACTTTGTTAGTGATGTGG
TTATCTCTCAGATGGCCAGTTTGCCCTCAGCGGCTCTTGGGATCACAGCGTCAGACTGTGGGATCTGAG
CCTGGGCGAGACAATCAGAAGCTTCATCGGCCACACCAGCGACGTGTTCTCCGTGTCTTTCAGCCCCGAC
AACCGGCAGATCGTGTCTGCCTCCAGAGACAAGACCATCAAGCTGTGGAACACACTGGCCCAGTGCAAG
```

TACACCATCACCGACCAGCAGCACACCGACTGGATCACCTGTGTGCGGTTAGCCCATCTCCTAACCAGG  
CCATTATCGTGTCTGCGGCTGGGACAAGCTGGTCAAAGTGTGGAACCTGAAGAAGTGCACCTGAACA  
AGAACCTGGAAGGCCACACCGGCGTGTGAACACCGTGACAATTAGCCCTGATGGCAGCCTGTGTGCC  
AGCGGCGGAAAAGATGGCGTGGCAAAGCTGTGGGACGTGAAAGAGGGCAAGCACCTGTACAGCCTGG  
AAACGGCAGCACCATCAACAGCCTGTGCTTACGCCCTGCGACTACTGGCTGTGTGCCGCCACCGACC  
GGTTCATCAGAATCTGGAACCTCGAGAGCAAGCTGATCATCAGCGAGATTACCCCGTGAAGCAGAGCA  
AGATCGGCGTGCCATGGTGTACCAGCCTGACTTGGAGCGCCAATGGCCAGCTGCTGTACTGTGGCAGCA  
CCGACGGCAACATCTACGTGTACGAAGTGAAGAAGCACAGCGTC

>Human RACK1

ATGACTGAGCAGATGACCCTTCGTGGCACCCTCAAGGGCCACAACGGCTGGGTAACCCAGATCGCTACT  
ACCCCGCAGTTCCCGGACATGATCCTCTCCGCCTCTCGAGATAAGACCATCATCATGTGGAAACTGACCA  
GGGATGAGACCAACTATGGAATTCCACAGCGTGCTCTGCGGGGTCACTCCCACTTTGTTAGTGATGTGG  
TTATCTCCTCAGATGGCCAGTTTGCCTCTCAGGCTCCTGGGATGGAACCCTGCGCCTCTGGGATCTCAC  
AACGGGCACCACCACGAGGCGATTTGTGGGCCATACCAAGGATGTGCTGAGTGTGGCCTTCTCCTCTGA  
CAACCGGCAGATTGTCTCTGGATCTCGAGATAAAACCATCAAGCTATGGAATACCCTGGGTGTGTGCAA  
ATACACTGTCCAGGATGAGAGCCACTCAGAGTGGGTGTCTTGTGTCCGCTTCTCGCCCAACAGCAGCAA  
CCCTATCATCGTCTCCTGTGGCTGGGACAAGCTGGTCAAGGTATGGAACCTGGCTAACTGCAAGCTGAA  
GACCAACCACATTGGCCACACAGGCTATCTGAACACGGTGACTGTCTCTCCAGATGGATCCCTCTGTGCT  
TCTGGAGGCAAGGATGGCCAGGCCATGTTATGGGATCTCAACGAAGGCAAACACCTTTACACGCTAGAT  
GGTGGGGACATCATCAACGCCCTGTGCTTCAGCCCTAACCGCTACTGGCTGTGTGCTGCCACAGGCCCC  
AGCATCAAGATCTGGGATTTAGAGGGAAAGATCATTGTAGATGAACTGAAGCAAGAAGTTATCAGTACC  
AGCAGCAAGGCAGAACCACCCAGTGCACCTCCCTGGCCTGGTCTGCTGATGGCCAGACTCTGTTTGT  
GGCTACACGGACAACCTGGTGCAGTGTGGCAGGTGACCATTGGCACACGC

>Human RACK1 RDK->DDE mutation

ATGACTGAGCAGATGACCCTTCGTGGCACCCTCAAGGGCCACAACGGCTGGGTAACCCAGATCGCTACT  
ACCCCGCAGTTCCCGGACATGATCCTCTCCGCCTCTGACGATGAGACCATCATCATGTGGAAACTGACCA  
GGGATGAGACCAACTATGGAATTCCACAGCGTGCTCTGCGGGGTCACTCCCACTTTGTTAGTGATGTGG  
TTATCTCCTCAGATGGCCAGTTTGCCTCTCAGGCTCCTGGGATGGAACCCTGCGCCTCTGGGATCTCAC  
AACGGGCACCACCACGAGGCGATTTGTGGGCCATACCAAGGATGTGCTGAGTGTGGCCTTCTCCTCTGA  
CAACCGGCAGATTGTCTCTGGATCTCGAGATAAAACCATCAAGCTATGGAATACCCTGGGTGTGTGCAA  
ATACACTGTCCAGGATGAGAGCCACTCAGAGTGGGTGTCTTGTGTCCGCTTCTCGCCCAACAGCAGCAA  
CCCTATCATCGTCTCCTGTGGCTGGGACAAGCTGGTCAAGGTATGGAACCTGGCTAACTGCAAGCTGAA  
GACCAACCACATTGGCCACACAGGCTATCTGAACACGGTGACTGTCTCTCCAGATGGATCCCTCTGTGCT  
TCTGGAGGCAAGGATGGCCAGGCCATGTTATGGGATCTCAACGAAGGCAAACACCTTTACACGCTAGAT  
GGTGGGGACATCATCAACGCCCTGTGCTTCAGCCCTAACCGCTACTGGCTGTGTGCTGCCACAGGCCCC  
AGCATCAAGATCTGGGATTTAGAGGGAAAGATCATTGTAGATGAACTGAAGCAAGAAGTTATCAGTACC  
AGCAGCAAGGCAGAACCACCCAGTGCACCTCCCTGGCCTGGTCTGCTGATGGCCAGACTCTGTTTGT  
GGCTACACGGACAACCTGGTGCAGTGTGGCAGGTGACCATTGGCACACGC

>Human RACK1 chimera (P. falciparum N-terminus, Human C-terminus)

ATGATGGACAACATCAAAGAGGCCGAGATCAGCCTGCGGGGAGTTCTGGAAGGCGGACACTCTGATTG  
GGTACCAGCGTGTCCACACCTACAGACCCCAAGCTGAAAACCATCGTGTCCGCCAGCCGGGACAAGAA

ACTGATCGTGTGGAACATCAACACCGACGACGACAGCGGCGAGATCGGCACAGCCAAGAAGTCTCTGA  
CAGGCCACAGCCAGGCCATCAACGACGTGTCCATCTCTAGCGACGGCCTGTTTGCCCTGTCAGGCTCCTG  
GGATGGAACCCTGCGCCTCTGGGATCTCACAACGGGCACCACCACGAGGCGATTTGTGGGCCATACCAA  
GGATGTGCTGAGTGTGGCCTTCTCCTCTGACAACCGGCAGATTGTCTCTGGATCTCGAGATAAAACCATC  
AAGCTATGGAATACCCTGGGTGTGTGCAAATACACTGTCCAGGATGAGAGCCACTCAGAGTGGGTGTCT  
TGTGTCCGCTTCTCGCCCAACAGCAGCAACCCTATCATCGTCTCCTGTGGCTGGGACAAGCTGGTCAAGG  
TATGGAACCTGGCTAACTGCAAGCTGAAGACCAACCACATTGGCCACACAGGCTATCTGAACACGGTGA  
CTGTCTCTCCAGATGGATCCCTCTGTGCTTCTGGAGGCAAGGATGGCCAGGCCATGTTATGGGATCTCAA  
CGAAGGCAAACACCTTTACACGCTAGATGGTGGGGACATCATCAACGCCCTGTGCTTCAGCCCTAACCG  
CTACTGGCTGTGTGCTGCCACAGGCCCCAGCATCAAGATCTGGGATTTAGAGGGAAAGATCATTGTAGA  
TGAAGTGAAGCAAGAAGTTATCAGTACCAGCAGCAAGGCAGAACCACCCAGTGCACCTCCCTGGCCTG  
GTCTGCTGATGGCCAGACTCTGTTTGCTGGCTACACGGACAACCTGGTGCGAGTGTGGCAGGTGACCAT  
TGGCACACGC
